# Supplementary material for: Rapid Detection of Antimicrobial Resistance Genes in Critically Ill Children Using a Custom TaqMan Array Card
Source: MDPI journal article supplement (doi:10.3390/antibiotics12121701), 2023-12-05
Supplement: s1 [file s1]

# Supplementary Tables and Figures - Rapid Detection of Antimicrobial Resistance Genes in Critically Ill Children Using a Custom TaqMan Array Card

John A. Clark <sup>1,2,\*</sup>, Martin D. Curran <sup>3</sup>, Theodore Gouliouris <sup>2,3</sup>, Andrew Conway Morris <sup>2,4,5</sup>, Rachel Bousfield <sup>2,3</sup>, Vilas Navapurkar <sup>2</sup>, Iain R. L. Kean <sup>1</sup>, Esther Daubney <sup>1</sup>, Deborah White <sup>1</sup>, Stephen Baker <sup>6</sup> and Nazima Pathan <sup>1,2</sup>

<sup>1</sup> Department of Paediatrics, University of Cambridge, Cambridge CB2 1TN, UK; irlk2@cam.ac.uk (I.R.L.K.); esther.daubney@nhs.net (E.D.); deborah.white31@nhs.net (D.W.); np409@cam.ac.uk (N.P.)

<sup>2</sup> Cambridge University Hospitals NHS Foundation Trust, UK; theodore.gouliouris@nhs.net (T.G.); ac926@cam.ac.uk (A.C.M.); rachel.bousfield@nhs.net (R.B.); vilas.navapurkar@nhs.net (V.N.)

<sup>3</sup> United Kingdom Health Security Agency, Clinical Microbiology and Public Health Laboratory, Cambridge, UK; martin.curran@nhs.net

<sup>4</sup> Division of Anaesthesia, Department of Medicine, University of Cambridge, Cambridge CB2 1TN, UK

<sup>5</sup> Division of Immunology, Department of Pathology, University of Cambridge, Cambridge CB2 1TN, UK

<sup>6</sup> Cambridge Institute of Therapeutic Immunology and Infectious Disease, University of Cambridge, Cambridge CB2 1TN, UK; sgb47@cam.ac.uk

\* Correspondence: jacla7@gmail.com; Tel.: +61-(0)-43725-6450

Table S1: Targets on the antimicrobial resistance gene TaqMan array card

| AMR gene target                  | Assay name    | Assay number | Forward primer 1000nM       | Reverse primer 1000nM         | 6FAM MGB probe 250nM     |
|----------------------------------|---------------|--------------|-----------------------------|-------------------------------|--------------------------|
| <i>bla</i> <sub>CTX-M-1</sub>    | Ba04646149_s1 | 10, 34       |                             |                               |                          |
|                                  | N/A           | 22           | ATGTGCAGYACCAGTAARGTKATGGC  | ATCACKCGGRTCGCCIGGRAT         | CCCGACAGCTGGGAGACGAAACGT |
| <i>bla</i> <sub>CTX-M-2</sub>    | Ba04646142_s1 | 12, 35       |                             |                               |                          |
| <i>bla</i> <sub>CTX-M-8/25</sub> | Ba04646154_s1 | 13, 36       |                             |                               |                          |
| <i>bla</i> <sub>CTX-M-9</sub>    | Ba04646127_s1 | 14, 37       |                             |                               |                          |
| <i>bla</i> <sub>CTX-M</sub>      | N/A           | 23           | ATGTGCAGYACCAGTAARGTKATGGC  | ATCACKCGGRTCGCCIGGRAT         | CGAYAATACNGCCATGAA       |
| <i>ermB</i>                      | Pa04230913_s1 | 15, 38       |                             |                               |                          |
| <i>bla</i> <sub>FOX (ampC)</sub> | Ba04646126_s1 | 2, 26        |                             |                               |                          |
| <i>bla</i> <sub>GES</sub>        | Ba04646151_s1 | 3, 27        |                             |                               |                          |
| <i>bla</i> <sub>IMP</sub>        | N/A           | 47           | CCCACGTATGCATCTGWATTAACAAA  | CCAAACCACTACGTTATCTKGAGTG     | AAGACGGTAAGGTNCAAGCYA    |
|                                  | N/A           | 48           | CCCACGTATGCATCTGWATTAACAAA  | CCAAACCACTACGTTATCTKGAGTG     | AATCCGGTAAGGTNCAAGCYA    |
| <i>bla</i> <sub>IMP-1</sub>      | Ba04646131_s1 | 5, 29        |                             |                               |                          |
| <i>bla</i> <sub>KPC</sub>        | Ba04646152_s1 | 4, 28        |                             |                               |                          |
|                                  | N/A           | 44           | GCAGCGGCAGCAGTTTGTGATT      | GTAGACGGCCAACACAATAGGTGC      | CAGTCGGAGACAAAACCGGA     |
| <i>mecA</i>                      | N/A           | 20           | TGGTATGTGGAAGTTAGATTGGGAT   | AGATACATTCTTTGGAACGATGCCTA    | CCAGGAATGCAGAAAGACCA     |
| <i>mecA/C</i>                    | N/A           | 21           | CAAGCAATAGAATCATCAGAYAACAT  | CCRTAACCTGAATCWGCTAATAATATTTC | CCRAGTGATTATCCMTT        |
| <i>bla</i> <sub>NDM</sub>        | N/A           | 46           | CAGCAAATGGAACTGGCGAC        | ATCCAGTTGAGGATCTGGGC          | CCGAATGTCTGGCAGCACACT    |
| <i>bla</i> <sub>NDM-1</sub>      | Ba04931076_s1 | 6, 30        |                             |                               |                          |
| <i>bla</i> <sub>OXA-48</sub>     | N/A           | 43           | ATTCGGGCTAAAACKGGATACTCGRCT | GATGTGGGCATATCCATATTCATCGCA   | ACCAGCCAATCTTAGGTTTCGAT  |
|                                  | Ba04930816_s1 | 7, 31        |                             |                               |                          |
| <i>bla</i> <sub>OXA-1</sub>      | Ba04646133_s1 | 1, 25        |                             |                               |                          |
| <i>bla</i> <sub>PER-1</sub>      | Ba04646140_s1 | 8, 32        |                             |                               |                          |
| <i>qnrA</i>                      | Ba04646160_s1 | 16, 39       |                             |                               |                          |
| <i>qnrS</i>                      | Ba04646145_s1 | 17, 40       |                             |                               |                          |
| <i>vanA</i>                      | N/A           | 24           | GGGCAGAGTATTGACTTCGT        | CCCGTGTGGATATGTTTTTACAAG      | CCGCATTGTACTGAACG        |
| <i>vanB</i>                      | N/A           | 42           | TCCGGTCGAGGAACGAAA          | GCCCTCTGCATCCAAGCA            | ACGGCAAAGAAAGTATATCGG    |
| <i>bla</i> <sub>VEB</sub>        | Ba04646153_s1 | 9, 33        |                             |                               |                          |
| <i>bla</i> <sub>VIM</sub>        | Ba04646155_s1 | 18, 41       |                             |                               |                          |
|                                  | N/A           | 45           | GCAAATTGGACTTCCYGTAACGC     | CCCGAAGGACATCAACGCC           | ACGCACTTTCATGACGACCG     |
| 18S rRNA gene                    | N/A           | 11           |                             |                               |                          |
| <i>MS2</i>                       | N/A           | 19           | TGGCACTACCCCTCTCCGTATTCACG  | GTACGGGCGACCCACGATGAC         | TCGATAGATCAAGGTGCCT      |

Table S2: Validation of antimicrobial resistance gene TaqMan array card with plasmids and ZeptoMetrix NATtrol panel

| Validation         | AMR genes present in validation sample | AMR-TAC Ct value(s)                     |
|--------------------|----------------------------------------|-----------------------------------------|
| VAP plasmid 1      | <i>bla</i> <sub>CTX-M-1</sub>          | <i>bla</i> <sub>CTX-M-1</sub> : 24/24   |
|                    | <i>bla</i> <sub>OXA-48</sub>           | <i>bla</i> <sub>CTX-M</sub> : 27        |
|                    | <i>bla</i> <sub>IMP</sub>              | <i>bla</i> <sub>OXA-48</sub> : 26/27/26 |
|                    |                                        | <i>bla</i> <sub>IMP</sub> : 26/25       |
| VAP plasmid 2      | <i>bla</i> <sub>CTX-M</sub>            | <i>bla</i> <sub>CTX-M-9</sub> : 27/28   |
|                    | <i>bla</i> <sub>NDM</sub>              | <i>bla</i> <sub>NDM</sub> : 27          |
|                    | <i>vanA</i>                            | <i>vanA</i> : 26                        |
|                    | <i>bla</i> <sub>VIM</sub>              | <i>bla</i> <sub>VIM</sub> : 32/28/21    |
| VAP plasmid 3      | <i>bla</i> <sub>KPC</sub>              | <i>bla</i> <sub>KPC</sub> : 19          |
|                    | <i>mecC</i>                            | <i>mecA/C</i> : 25                      |
|                    | <i>vanB</i>                            | <i>vanB</i> : 18                        |
| ZeptoMetrix pool 1 | <i>bla</i> <sub>IMP</sub>              | <i>bla</i> <sub>IMP-1</sub> : 30/31     |
|                    | <i>bla</i> <sub>OXA-48-like</sub>      | <i>bla</i> <sub>IMP</sub> : 33          |
|                    | <i>bla</i> <sub>CTX-M</sub>            | <i>bla</i> <sub>OXA-1</sub> : 22/22     |
|                    |                                        | <i>bla</i> <sub>OXA-48</sub> : 22/23/23 |
|                    |                                        | <i>bla</i> <sub>CTX-M-1</sub> : 22.5/22 |
|                    |                                        | <i>bla</i> <sub>CTX-M</sub> : 25        |
| ZeptoMetrix pool 2 | <i>bla</i> <sub>KPC</sub>              | <i>bla</i> <sub>KPC</sub> : 24/25/21    |
|                    | <i>bla</i> <sub>VIM</sub>              | <i>bla</i> <sub>OXA-1</sub> : 27/27     |
|                    |                                        | <i>bla</i> <sub>VIM</sub> : 28/30/28    |
| ZeptoMetrix pool 3 | <i>bla</i> <sub>NDM</sub>              | <i>bla</i> <sub>NDM-1</sub> : 22/22     |
|                    | <i>bla</i> <sub>CTX-M</sub>            | <i>bla</i> <sub>NDM</sub> : 21          |
|                    | <i>mecA/C</i> , MREJ                   | <i>bla</i> <sub>OXA-1</sub> : 24/23     |
|                    |                                        | <i>bla</i> <sub>CTX-M-1</sub> : 20/19   |
|                    |                                        | <i>bla</i> <sub>CTX-M</sub> : 23        |
|                    |                                        | <i>mecA</i> : 27                        |
|                    |                                        | <i>mecA/C</i> : 28                      |
| ZeptoMetrix pool 4 | N/A                                    | Nil                                     |
| ZeptoMetrix pool 5 | N/A                                    | Nil                                     |

Table S3: Inter-assay reproducibility of an antimicrobial resistance gene TaqMan array card using faecal sewage

| Assay                               | Cycle threshold value |        |        |        |        |        |        | Mean (SD)  |
|-------------------------------------|-----------------------|--------|--------|--------|--------|--------|--------|------------|
|                                     | Card 1                | Card 2 | Card 3 | Card 4 | Card 5 | Card 6 | Card 7 |            |
| 1 <i>bla</i> <sub>OXA-1</sub>       | 21.4                  | 21.0   | 22.1   | 23.8   | 23.2   | 24.6   | 21.7   | 22.6 (1.3) |
| 2 <i>ampC</i>                       | 24.5                  | 24.2   | 24.7   | 27.2   | 26.4   | 28.3   | 24.7   | 25.7 (1.6) |
| 3 <i>bla</i> <sub>GES</sub>         | 19.1                  | 19.0   | 19.7   | 21.1   | 20.3   | 21.8   | 19.2   | 20.0 (1.1) |
| 4 <i>bla</i> <sub>KPC</sub>         | 26.0                  | 25.9   | 26.4   | 26.0   | 26.3   | 27.4   | 25.5   | 26.2 (0.6) |
| 5 <i>bla</i> <sub>IMP-1</sub>       | 22.3                  | 22.3   | 23.4   | 24.3   | 24.9   | 24.8   | 22.5   | 23.5 (1.2) |
| 6 <i>bla</i> <sub>NDM-1</sub>       | 22.2                  | 21.5   | 22.3   | 24.3   | 23.9   | 24.7   | 21.5   | 22.9 (1.3) |
| 7 <i>bla</i> <sub>OXA-48</sub>      | 26.2                  | 25.5   | 27.4   | 27.6   | 27.0   | 27.8   | 26.1   | 26.8 (0.9) |
| 8 <i>bla</i> <sub>PER-1</sub>       | 24.6                  | 24.6   | 25.1   | 25.9   | 24.9   | 25.6   | 25.2   | 25.1 (0.5) |
| 9 <i>bla</i> <sub>VEB</sub>         | 25.1                  | 25.5   | 26.4   | 27.1   | 26.9   | 28.1   | 25.5   | 26.4 (1.1) |
| 10 <i>bla</i> <sub>CTX-M-1</sub>    | 28.3                  | 28.0   | 28.4   | 26.5   | 26.5   | 26.6   | 27.7   | 27.4 (0.9) |
| 11 18S rRNA gene                    | 16.6                  | 16.5   | 17.0   | 16.7   | 15.6   | 16.3   | 15.6   | 16.3 (0.5) |
| 12 <i>bla</i> <sub>CTX-M-2</sub>    | -                     | -      | -      | -      | -      | -      | -      |            |
| 13 <i>bla</i> <sub>CTX-M-8/25</sub> | -                     | -      | -      | -      | -      | -      | -      |            |
| 14 <i>bla</i> <sub>CTX-M-9</sub>    | 33.3                  | 32.4   | 34.9   | 33.4   | 33.1   | 34.5   | 31.6   | 33.3 (1.1) |
| 15 <i>ermB</i>                      | 20.9                  | 21.5   | 22.8   | 21.7   | 21.1   | 21.6   | 21.1   | 21.5 (0.6) |
| 16 <i>qnrA</i>                      | 23.9                  | 23.3   | 24.2   | 26.7   | 26.3   | 27.1   | 23.2   | 25.0 (1.7) |
| 17 <i>qnrS</i>                      | 35.3                  | 33.5   | 33.6   |        | 34.0   | 34.5   | 32.5   | 33.9 (1.0) |
| 18 <i>bla</i> <sub>VIM</sub>        | 26.5                  | 27.0   | 30.4   | 27.3   | 25.2   | 27.5   | 26.4   | 27.2 (1.6) |
| 19 MS2                              | 29.7                  | 29.4   | 31.0   | 30.0   | 27.2   | 30.5   | 27.6   | 29.3 (1.4) |
| 20 <i>mecA</i>                      | 30.9                  | -      | 36.2   | 32.7   | -      | 32.2   | -      | 33.0 (2.3) |
| 21 <i>mecA/C</i>                    | 34.8                  | 35.0   | 36.7   | 33.3   | 35.9   | 33.8   | 33.9   | 34.8 (1.2) |
| 22 <i>bla</i> <sub>CTX-M</sub>      | 31.4                  | 32.1   | 33.6   | 27.9   | 29.5   | 29.6   | 30.5   | 30.7 (1.9) |
| 23 <i>bla</i> <sub>CTX-M</sub>      | !                     | !      | !      | !      | !      | !      | !      |            |
| 24 <i>vanA</i>                      | 25.3                  | 26.4   | 27.0   | 26.3   | 25.8   | 26.1   | 25.8   | 26.1 (0.5) |
| 25 <i>bla</i> <sub>OXA-1</sub>      | 21.2                  | 21.4   | 22.2   | 23.7   | 23.2   | 24.4   | 22.0   | 22.6 (1.2) |
| 26 <i>ampC</i>                      | 25.1                  | 24.8   | 25.5   | 27.9   | 26.5   | 28.4   | 24.6   | 26.1 (1.5) |
| 27 <i>bla</i> <sub>GES</sub>        | 18.3                  | 18.5   | 19.6   | 20.7   | 20.5   | 21.6   | 19.3   | 19.8 (1.2) |
| 28 <i>bla</i> <sub>KPC</sub>        | 26.1                  | 26.1   | 23.4   | 26.2   | 26.3   | 27.5   | 25.3   | 25.9 (1.3) |
| 29 <i>bla</i> <sub>IMP-1</sub>      | 23.2                  | 22.7   | 23.6   | 25.4   | 24.9   | 25.0   | 22.6   | 23.9 (1.2) |
| 30 <i>bla</i> <sub>NDM-1</sub>      | 22.3                  | 22.2   | 22.1   | 24.7   | 24.1   | 24.4   | 21.6   | 23.1 (1.3) |
| 31 <i>bla</i> <sub>OXA-48</sub>     | 25.6                  | 26.9   | 28.6   | 27.8   | 26.9   | 28.1   | 26.7   | 27.2 (1.0) |
| 32 <i>bla</i> <sub>PER-1</sub>      | 25.0                  | 24.9   | 25.3   | 25.6   | 25.2   | 25.8   | 25.2   | 25.3 (0.3) |
| 33 <i>bla</i> <sub>VEB</sub>        | 25.7                  | 25.6   | 26.1   | 27.5   | 26.8   | 27.4   | 25.2   | 26.3 (0.9) |
| 34 <i>bla</i> <sub>CTX-M-1</sub>    | 28.4                  | 28.1   | 28.3   | 26.4   | 26.4   | 26.2   | 27.5   | 27.3 (1.0) |
| 35 <i>bla</i> <sub>CTX-M-2</sub>    | -                     | -      | -      | -      | -      | -      | -      |            |
| 36 <i>bla</i> <sub>CTX-M-8/25</sub> | -                     | -      | -      | -      | -      | -      | -      |            |
| 37 <i>bla</i> <sub>CTX-M-9</sub>    | 34.4                  | 33.5   | 33.7   | 35.4   | 35.6   | 33.0   | 32.7   | 34.0 (1.2) |
| 38 <i>ermB</i>                      | 21.6                  | 21.4   | 21.7   | 21.6   | 21.3   | 22.3   | 21.0   | 21.6 (0.4) |
| 39 <i>qnrA</i>                      | 23.8                  | 23.3   | 23.5   | 26.4   | 26.5   | 26.4   | 23.1   | 24.7 (1.6) |
| 40 <i>qnrS</i>                      | 36.6                  | 35.0   | 36.1   |        | 37.7   | 34.9   | 33.1   | 35.6 (1.6) |
| 41 <i>bla</i> <sub>VIM</sub>        | 25.7                  | 27.2   | 29.4   | 28.6   | 25.1   | 27.1   | 26.1   | 27.0 (1.5) |
| 42 <i>vanB</i>                      | 25.7                  | 27.7   | 29.0   | 24.9   | 24.8   | 25.9   | 27.4   | 26.5 (1.6) |

|    |                           |      |      |      |      |      |      |      |            |
|----|---------------------------|------|------|------|------|------|------|------|------------|
| 43 | <i>bla</i> <sub>OXA</sub> | 22.4 | 21.1 | 22.5 | 23.6 | 23.1 | 24.3 | 21.8 | 22.7 (1.1) |
| 44 | <i>bla</i> <sub>KPC</sub> | 27.1 | 26.6 | 26.7 | 27.4 | 26.2 | 26.0 | 25.6 | 26.5 (0.6) |
| 45 | <i>bla</i> <sub>VIM</sub> | 23.6 | 22.8 | 23.1 | 23.5 | 22.1 | 23.0 | 22.2 | 22.9 (0.6) |
| 46 | <i>bla</i> <sub>NDM</sub> | 24.7 | 21.4 | 24.4 | 27.7 | 26.1 | 27.6 | 23.9 | 25.1 (2.2) |
| 47 | <i>bla</i> <sub>IMP</sub> | 24.9 | 23.9 | 26.7 | 26.5 | 27.5 | 28.3 | 26.0 | 26.3 (1.5) |
| 48 | <i>bla</i> <sub>IMP</sub> | 26.3 | 31.5 | 33.2 | 30.0 | 31.9 | 30.8 | 29.9 | 30.5 (2.2) |

! :failed assay; - :negative

Table S4: Antimicrobial resistance genes identified on samples with phenotypic resistance

| Validation sample | Sample ID                     | Bacteria           | Known phenotypic/genotypic resistance                                                                                                                                                                                                | AMR gene card result                                          | Concordant with AMR-TAC |
|-------------------|-------------------------------|--------------------|--------------------------------------------------------------------------------------------------------------------------------------------------------------------------------------------------------------------------------------|---------------------------------------------------------------|-------------------------|
| 1                 | 102074                        | <i>S. aureus</i>   | MRSA                                                                                                                                                                                                                                 | <i>mecA/C</i> : 16                                            | ☉                       |
| 2                 | 102073                        | <i>S. aureus</i>   | MRSA                                                                                                                                                                                                                                 | <i>mecA/C</i> : 16                                            | ☉                       |
| 3                 | 102072                        | <i>S. aureus</i>   | MRSA                                                                                                                                                                                                                                 | <i>mecA</i> : 31<br><i>mecA/C</i> : 32                        | ☉                       |
| 4                 | SA227                         | <i>S. aureus</i>   | <i>MecC</i>                                                                                                                                                                                                                          | <i>mecA/C</i> : 16                                            | ☉                       |
| 5                 | LGA 706(2)                    | <i>S. aureus</i>   | <i>MecC</i>                                                                                                                                                                                                                          | <i>mecA/C</i> : 21                                            | ☉                       |
| 6                 | 160002 MU50                   | <i>S. aureus</i>   | MSSA                                                                                                                                                                                                                                 | -                                                             | ☉                       |
| 7                 | 73048 eMRSA 3                 | <i>S. aureus</i>   | MRSA                                                                                                                                                                                                                                 | <i>mecA</i> : 15<br><i>mecA/C</i> : 15                        | ☉                       |
| 8                 | 17077 France 5                | <i>S. aureus</i>   | MRSA                                                                                                                                                                                                                                 | <i>mecA</i> :13<br><i>mecA/C</i> : 15                         | ☉                       |
| 9                 | 17098 CA - MRSA MLST ST80     | <i>S. aureus</i>   | MRSA                                                                                                                                                                                                                                 | <i>mecA</i> : 15<br><i>mecA/C</i> : 16                        | ☉                       |
| 10                | 07045 Australia Sydney        | <i>S. aureus</i>   | MRSA                                                                                                                                                                                                                                 | <i>mecA</i> : 13<br><i>mecA/C</i> : 15                        | ☉                       |
| 11                | WIS21093 19                   | <i>S. aureus</i>   | MRSA                                                                                                                                                                                                                                 | <i>mecA</i> : 14<br><i>mecA/C</i> : 15                        | ☉                       |
| 12                | 17061 Japan 8                 | <i>S. aureus</i>   | MRSA                                                                                                                                                                                                                                 | <i>mecA</i> : 15<br><i>mecA/C</i> : 16<br><i>ermB</i> : 15/14 | ☉/?                     |
| 13                | NCTC 13379                    | <i>E. faecalis</i> | <i>vanHBX</i><br><i>ermB</i><br><i>aac(6')-aph(2'')</i> <sup>§</sup><br><i>ant(6)-Ia</i> <sup>§</sup><br><i>aph(3')-III</i> <sup>§</sup><br><i>Isa(A)</i> <sup>§</sup><br><i>qacZ</i> <sup>§</sup><br><i>cat(pC233)</i> <sup>§</sup> | <i>vanB</i> : 16<br><i>ermB</i> : 17/16                       | ☉                       |
| 14                | NCTC 12952                    | <i>E. faecium</i>  | <i>vanHBX</i><br><i>msr(C)</i> <sup>§</sup><br><i>tet(M)</i> <sup>§</sup><br><i>aac(6')-II</i> <sup>§</sup>                                                                                                                          | <i>vanB</i> : 17                                              | ☉                       |
| 15                | 73082 France 2                | <i>S. aureus</i>   | MRSA                                                                                                                                                                                                                                 | <i>mecA</i> :16<br><i>mecA/C</i> : 17                         | ☉                       |
| 16                | 73047 - 4                     | <i>S. aureus</i>   | MRSA                                                                                                                                                                                                                                 | <i>mecA</i> : 13<br><i>mecA/C</i> : 15                        | ☉                       |
| 17                | 17069 Denmark DLL4916 - 7     | <i>S. aureus</i>   | MRSA                                                                                                                                                                                                                                 | <i>mecA</i> : 16<br><i>mecA/C</i> : 18                        | ☉                       |
| 18                | 17048 UK early strain RL13136 | <i>S. aureus</i>   | MRSA                                                                                                                                                                                                                                 | <i>mecA</i> : 15<br><i>mecA/C</i> : 18                        | ☉                       |
| 19                | 07060 Atlanta USA 80760R7     | <i>S. aureus</i>   | MRSA                                                                                                                                                                                                                                 | <i>mecA</i> : 18<br><i>mecA/C</i> : 18                        | ☉                       |
| 20                | 07059 - SF40R6LA              | <i>S. aureus</i>   | MRSA                                                                                                                                                                                                                                 | <i>mecA</i> : 15<br><i>mecA/C</i> : 16                        | ☉                       |
| 21                | * Anonymised *VRE             | <i>E. faecium</i>  | <i>vanA</i>                                                                                                                                                                                                                          | <i>vanA</i> : 20<br><i>ermB</i> : 18/18                       | ☉/?                     |
| 22                | * Anonymised * VRE            | <i>E. faecium</i>  | <i>vanA</i>                                                                                                                                                                                                                          | <i>vanA</i> : 22<br><i>ermB</i> : 20/20                       | ☉/?                     |
| 23                | * Anonymised * VRE            | <i>E. faecium</i>  | <i>vanA</i>                                                                                                                                                                                                                          | <i>vanA</i> : 21                                              | ☉                       |

|    |                |                      |                                                                                                                                                                                                                                                                                                                                                                                                            |                                                            |     |
|----|----------------|----------------------|------------------------------------------------------------------------------------------------------------------------------------------------------------------------------------------------------------------------------------------------------------------------------------------------------------------------------------------------------------------------------------------------------------|------------------------------------------------------------|-----|
| 24 | * Anonymised * | <i>E. faecium</i>    | <i>vanA</i>                                                                                                                                                                                                                                                                                                                                                                                                | <i>vanA</i> : 22<br><i>ermB</i> : 19/19                    | ⊙/? |
| 25 | * Anonymised * | <i>E. faecalis</i>   | <i>vanA</i>                                                                                                                                                                                                                                                                                                                                                                                                | <i>vanA</i> : 19<br><i>ermB</i> : 18/18                    | ⊙/? |
| 26 | * Anonymised * | <i>E. faecalis</i>   | <i>vanA</i>                                                                                                                                                                                                                                                                                                                                                                                                | <i>vanA</i> : 20<br><i>ermB</i> : 19/19                    | ⊙/? |
| 27 | * Anonymised * | <i>E. faecium</i>    | Fully<br>susceptible                                                                                                                                                                                                                                                                                                                                                                                       | -                                                          | ⊙   |
| 28 | NCTC 13439     | <i>K. pneumoniae</i> | <i>qnrS1</i><br><i>bla<sub>VIM-1</sub></i><br><i>fosA</i> <sup>s</sup><br><i>aac(6')-Ib3</i> <sup>s</sup><br><i>aac(6')-Ib-cr</i> <sup>s</sup><br><i>OqxB</i> <sup>s</sup><br><i>OqxA</i> <sup>s</sup><br><i>dfrA14</i> <sup>s</sup><br><i>blaSHV-178</i> <sup>s</sup><br><i>bla<sub>SHV-36</sub></i> <sup>s</sup><br><i>bla<sub>SHV-80</sub></i> <sup>s</sup><br><i>bla<sub>SHV-12</sub></i> <sup>s</sup> | <i>qnrS</i> : 21/22<br><i>bla<sub>VIM</sub></i> : 28/28/23 | ⊙   |

|    |            |                      |                                                                                                                                                                                                                                                                                                                                                                                                                                                                                                                                                                                                                                                                                                                                                                                                                                                                                                                                                                                                                                                                                                                                                                                                                                                                                                                                                                                                                                                                                                                                                                                                               |                                                                                                                                                                           |     |
|----|------------|----------------------|---------------------------------------------------------------------------------------------------------------------------------------------------------------------------------------------------------------------------------------------------------------------------------------------------------------------------------------------------------------------------------------------------------------------------------------------------------------------------------------------------------------------------------------------------------------------------------------------------------------------------------------------------------------------------------------------------------------------------------------------------------------------------------------------------------------------------------------------------------------------------------------------------------------------------------------------------------------------------------------------------------------------------------------------------------------------------------------------------------------------------------------------------------------------------------------------------------------------------------------------------------------------------------------------------------------------------------------------------------------------------------------------------------------------------------------------------------------------------------------------------------------------------------------------------------------------------------------------------------------|---------------------------------------------------------------------------------------------------------------------------------------------------------------------------|-----|
| 29 | NCTC 13443 | <i>K. pneumoniae</i> | <i>bla</i> <sub>NDM-1</sub><br><i>bla</i> <sub>CTX-M-15</sub><br><i>bla</i> <sub>OXA-1</sub><br><i>msr</i> (E) <sup>s</sup><br><i>fosA</i> <sup>s</sup><br><i>aac</i> (3)- <i>IId</i> <sup>s</sup><br><i>aph</i> (6)- <i>Id</i> <sup>s</sup><br><i>aac</i> (6')- <i>Ib</i> <sup>s</sup><br><i>aadA1</i> <sup>s</sup><br><i>aac</i> (6')- <i>Ib-cr</i> <sup>s</sup><br><i>aac</i> (3)- <i>IIa</i> <sup>s</sup><br><i>armA</i> , <i>aph</i> (3'')- <i>Ib</i> <sup>s</sup><br><i>ere</i> (A) <sup>s</sup><br><i>msr</i> (E) <sup>s</sup><br><i>mph</i> (E) <sup>s</sup><br><i>OqxA</i> <sup>s</sup><br><i>OqxB</i> <sup>s</sup><br><i>dfrA1</i> <sup>s</sup><br><i>sul2</i> <sup>s</sup><br><i>sul1</i> <sup>s</sup><br><i>ARR-2</i> <sup>s</sup><br><i>aadA1</i> <sup>s</sup><br><i>bla</i> <sub>SHV-70</sub> <sup>s</sup><br><i>bla</i> <sub>SHV-13</sub> <sup>s</sup><br><i>bla</i> <sub>SHV-11</sub> <sup>s</sup><br><i>bla</i> <sub>SHV-28</sub> <sup>s</sup><br><i>bla</i> <sub>SHV-25</sub> <sup>s</sup> <i>bla</i> <sub>TEM-</sub><br><i>1A</i> <sup>s</sup> <i>bla</i> <sub>DHA-7</sub> <sup>s</sup><br><i>bla</i> <sub>SHV-31</sub> <sup>s</sup><br><i>bla</i> <sub>DHA-24</sub> <sup>s</sup><br><i>bla</i> <sub>SHV-69</sub> <sup>s</sup><br><i>bla</i> <sub>SHV-185</sub> <sup>s</sup><br><i>bla</i> <sub>CMY-4</sub> <sup>s</sup><br><i>bla</i> <sub>DHA-1</sub> <sup>s</sup><br><i>bla</i> <sub>SHV-106</sub> <sup>s</sup> <i>bla</i> <sub>TEM-</sub><br><i>1B</i> <sup>s</sup><br><i>qacE</i> <sup>s</sup><br><i>catB3</i> <sup>s</sup><br><i>catA1</i> <sup>s</sup><br><i>cmlA1</i> <sup>s</sup> | <i>bla</i> <sub>NDM-1</sub> : 17/17<br><i>bla</i> <sub>NDM</sub> : 19<br><i>bla</i> <sub>CTX-M</sub> : 18<br><i>bla</i> <sub>CTX-M-1</sub> : 17/18<br><i>qnrS</i> : 18/18 | ◎/x |
|----|------------|----------------------|---------------------------------------------------------------------------------------------------------------------------------------------------------------------------------------------------------------------------------------------------------------------------------------------------------------------------------------------------------------------------------------------------------------------------------------------------------------------------------------------------------------------------------------------------------------------------------------------------------------------------------------------------------------------------------------------------------------------------------------------------------------------------------------------------------------------------------------------------------------------------------------------------------------------------------------------------------------------------------------------------------------------------------------------------------------------------------------------------------------------------------------------------------------------------------------------------------------------------------------------------------------------------------------------------------------------------------------------------------------------------------------------------------------------------------------------------------------------------------------------------------------------------------------------------------------------------------------------------------------|---------------------------------------------------------------------------------------------------------------------------------------------------------------------------|-----|

---



|    |            |                      |                                                                                                                                                                                                                                                                                                                                                                                                                                                                                                                                                                                                                                                |                                         |   |
|----|------------|----------------------|------------------------------------------------------------------------------------------------------------------------------------------------------------------------------------------------------------------------------------------------------------------------------------------------------------------------------------------------------------------------------------------------------------------------------------------------------------------------------------------------------------------------------------------------------------------------------------------------------------------------------------------------|-----------------------------------------|---|
| 30 | NCTC 13442 | <i>K. pneumoniae</i> | <i>bla</i> <sub>OXA-48</sub><br><i>aph</i> (3')-Ia <sup>s</sup><br><i>fosA</i> <sup>s</sup><br><i>ere</i> (A) <sup>s</sup><br><i>OqxA</i> <sup>s</sup><br><i>OqxB</i> <sup>s</sup><br><i>dfrA5</i> <sup>s</sup><br><i>sul1</i> <sup>s</sup><br><i>dfra14</i> <sup>s</sup><br><i>tet</i> (C) <sup>s</sup><br><i>bla</i> <sub>SHV-79</sub> <sup>s</sup><br><i>bla</i> <sub>SHV-89</sub> <sup>s</sup><br><i>bla</i> <sub>SHV-56</sub> <sup>s</sup><br><i>bla</i> <sub>SHV-85</sub> <sup>s</sup><br><i>bla</i> <sub>TEM-1B</sub> <sup>s</sup><br><i>bla</i> <sub>SHV-4</sub> <sup>s</sup><br><i>qacE</i> <sup>s</sup><br><i>catA1</i> <sup>s</sup> | <i>bla</i> <sub>OXA-48</sub> : 16/18/17 | ⊙ |
| 31 | NCTC 13438 | <i>K. pneumoniae</i> | <i>bla</i> <sub>KPC-3</sub><br><i>bla</i> <sub>OXA-9</sub> <sup>s</sup><br><i>aph</i> (3')-Ia <sup>s</sup><br><i>aac</i> (6')-Ib <sup>s</sup><br><i>aadA2b</i> <sup>s</sup><br><i>aadA2</i> <sup>s</sup><br><i>fosA</i> <sup>s</sup><br><i>mph</i> (A) <sup>s</sup><br><i>OqxA</i> <sup>s</sup><br><i>OqxB</i> <sup>s</sup><br><i>aac</i> (6')-Ib-cr <sup>s</sup><br><i>sul1</i> <sup>s</sup><br><i>dfrA12</i> <sup>s</sup><br><i>bla</i> <sub>SHV-182</sub> <sup>s</sup><br><i>bla</i> <sub>TEM-1A</sub> <sup>s</sup><br><i>qacE</i> <sup>s</sup><br><i>catA1</i> <sup>s</sup>                                                                | <i>bla</i> <sub>KPC</sub> : 18/17/19    | ⊙ |

|    |                    |                                          |                                                                                                                                                                            |                                                                                                                                                                                           |     |
|----|--------------------|------------------------------------------|----------------------------------------------------------------------------------------------------------------------------------------------------------------------------|-------------------------------------------------------------------------------------------------------------------------------------------------------------------------------------------|-----|
| 32 | * Anonymised *     | <i>E. cloacae</i>                        | <i>bla</i> <sub>IMP</sub>                                                                                                                                                  | <i>bla</i> <sub>IMP</sub> : 20<br><i>bla</i> <sub>IMP-1</sub> : 16/16<br><i>qnrA</i> : 16/16                                                                                              | ⊙/? |
| 33 | * Anonymised *     | <i>K. pneumoniae</i>                     | <i>bla</i> <sub>NDM</sub>                                                                                                                                                  | <i>bla</i> <sub>NDM</sub> : 17<br><i>bla</i> <sub>NDM-1</sub> : 15/16<br><i>bla</i> <sub>CTX-M</sub> : 18<br><i>bla</i> <sub>CTX-M-1</sub> : 17/17                                        | ⊙/? |
| 34 | * Anonymised *     | <i>E. cloacae</i>                        | <i>bla</i> <sub>IMP-1</sub>                                                                                                                                                | <i>bla</i> <sub>IMP</sub> : 18<br><i>bla</i> <sub>IMP-1</sub> : 15/15<br><i>qnrA</i> : 15/15                                                                                              | ⊙/? |
| 35 | ME21               | Unknown                                  | <i>bla</i> <sub>KPC</sub><br><i>bla</i> <sub>OXA-48</sub>                                                                                                                  | <i>bla</i> <sub>KPC</sub> : 18/19/18<br><i>bla</i> <sub>OXA-48</sub> : 35/34/18<br><i>bla</i> <sub>CTX-M-9</sub> : 20/20<br><i>qnrA</i> : 18/18<br><i>qnrS</i> : 18/17                    | ⊙/? |
| 36 | * Anonymised *     | <i>P. aeruginosa</i>                     | Unknown                                                                                                                                                                    | -                                                                                                                                                                                         | ?   |
| 37 | * Anonymised *     | <i>P. aeruginosa</i>                     | Fully susceptible                                                                                                                                                          | -                                                                                                                                                                                         | ⊙   |
| 38 | * Anonymised *     | <i>P. aeruginosa</i>                     | Fully susceptible                                                                                                                                                          | -                                                                                                                                                                                         | ⊙   |
| 39 | ESBL15-01          | <i>S. marcescens</i>                     | <i>bla</i> <sub>IMP-1</sub>                                                                                                                                                | <i>bla</i> <sub>IMP</sub> : 16/18<br><i>bla</i> <sub>IMP-1</sub> : 19/18                                                                                                                  | ⊙   |
| 40 | ESBL15-02          | <i>E. coli</i>                           | <i>bla</i> <sub>OXA-48</sub><br><i>bla</i> <sub>CTX-M-27</sub> (group 9)<br><i>bla</i> <sub>TEM-1</sub> §                                                                  | <i>bla</i> <sub>OXA-48</sub> : 18/21/20<br><i>bla</i> <sub>CTX-M-9</sub> : 20/22<br><i>ermB</i> : 20/20                                                                                   | ⊙/? |
| 41 | ESBL15-04          | <i>K. pneumoniae</i>                     | <i>bla</i> <sub>OXA-232</sub> ( <i>bla</i> <sub>OXA-48</sub> -like)<br><i>bla</i> <sub>NDM-1</sub><br><i>bla</i> <sub>SHV-28</sub> §                                       | <i>bla</i> <sub>NDM-1</sub> : 22/22<br><i>bla</i> <sub>NDM</sub> : 25<br><i>bla</i> <sub>OXA-1</sub> : 22/22<br><i>bla</i> <sub>OXA-48</sub> : 20                                         | ⊙   |
| 42 | ESBL15-05          | <i>E. cloacae</i>                        | <i>bla</i> <sub>CTX-M-15</sub> (group 1)<br><i>bla</i> <sub>NDM-1</sub><br><i>bla</i> <sub>TEM-1</sub> §<br><i>bla</i> <sub>SHV-12</sub> §                                 | <i>bla</i> <sub>OXA-1</sub> : 19/18<br><i>bla</i> <sub>CTX-M</sub> : 18<br><i>bla</i> <sub>CTX-M-1</sub> : 16/17<br><i>bla</i> <sub>NDM</sub> : 20<br><i>bla</i> <sub>NDM-1</sub> : 18/17 | ⊙/? |
| 43 | ESBL15-07          | <i>E. coli</i>                           | <i>bla</i> <sub>CTX-M-55</sub> (group 1)<br><i>bla</i> <sub>TEM-1</sub> §                                                                                                  | <i>bla</i> <sub>CTX-M</sub> : 21<br><i>bla</i> <sub>CTX-M-1</sub> : 20/20<br><i>bla</i> <sub>NDM</sub> : 20<br><i>bla</i> <sub>NDM-1</sub> : 18/17                                        | ⊙/? |
| 44 | ESBL15-09          | <i>E. coli</i> /<br><i>K. pneumoniae</i> | <i>bla</i> <sub>KPC-3</sub><br><i>bla</i> <sub>OXA-48</sub><br><i>bla</i> <sub>CTX-M-27</sub> (group 9)<br><i>bla</i> <sub>TEM-1</sub> §<br><i>bla</i> <sub>SHV-11</sub> § | <i>bla</i> <sub>KPC</sub> : 23/23/24<br><i>bla</i> <sub>OXA-48</sub> : 21/19/21<br><i>bla</i> <sub>CTX-M-9</sub> : 22/22<br><i>ermB</i> : 21/21                                           | ⊙/? |
| 45 | ESBL15-10          | <i>Enterobacter aerogenes</i>            | <i>bla</i> <sub>TEM-24</sub> §<br><i>bla</i> <sub>SHV-2a</sub> §                                                                                                           |                                                                                                                                                                                           | ⊙   |
| 46 | ESBL15-11          | <i>K. pneumoniae</i>                     | <i>bla</i> <sub>CTX-M-14</sub> (group 9)<br><i>bla</i> <sub>SHU-76</sub> -like §                                                                                           | <i>bla</i> <sub>CTX-M-9</sub> : 22/23<br><i>qnrS</i> : 21/22                                                                                                                              | ⊙/? |
| 47 | GES control (neat) | Unknown                                  | <i>bla</i> <sub>GES</sub>                                                                                                                                                  | <i>bla</i> <sub>GES</sub> : 15/14                                                                                                                                                         | ⊙   |

|    |                                                 |         |                               |                                                                                                               |     |
|----|-------------------------------------------------|---------|-------------------------------|---------------------------------------------------------------------------------------------------------------|-----|
| 48 | GES control (1:20)                              | Unknown | <i>bla<sub>GES</sub></i>      | <i>bla<sub>GES</sub></i> : 13/11                                                                              | ☉   |
| 49 | FOX control (neat)                              | Unknown | <i>AmpC</i>                   | <i>AmpC</i> : 20/10                                                                                           | ☉   |
| 50 | FOX control (1:20)                              | Unknown | <i>AmpC</i>                   | <i>AmpC</i> : 23/23                                                                                           | ☉   |
| 51 | <i>bla<sub>CTX-M-15</sub></i> control<br>(neat) | Unknown | <i>bla<sub>CTX-M-15</sub></i> | <i>bla<sub>OXA-1</sub></i> : 20/21<br><i>bla<sub>CTX-M</sub></i> : 21<br><i>bla<sub>CTX-M-1</sub></i> : 18/19 | ☉/? |

|    |                                               |                      |                                                                                                                                                                                                                                                                                                                                                                                                                                                                                                                                                                                                                                                                                                                                                                                                                                                                                                                                                                                                                                                   |                                                                                                                         |     |
|----|-----------------------------------------------|----------------------|---------------------------------------------------------------------------------------------------------------------------------------------------------------------------------------------------------------------------------------------------------------------------------------------------------------------------------------------------------------------------------------------------------------------------------------------------------------------------------------------------------------------------------------------------------------------------------------------------------------------------------------------------------------------------------------------------------------------------------------------------------------------------------------------------------------------------------------------------------------------------------------------------------------------------------------------------------------------------------------------------------------------------------------------------|-------------------------------------------------------------------------------------------------------------------------|-----|
| 52 | <i>bla</i> <sub>CTX-M-2</sub> control (neat)  | Unknown              | <i>bla</i> <sub>CTX-M-2</sub>                                                                                                                                                                                                                                                                                                                                                                                                                                                                                                                                                                                                                                                                                                                                                                                                                                                                                                                                                                                                                     | <i>bla</i> <sub>CTX-M-2</sub> : 22/22                                                                                   | ☉   |
| 53 | <i>bla</i> <sub>CTX-M-9</sub> control (neat)  | Unknown              | <i>bla</i> <sub>CTX-M-9</sub>                                                                                                                                                                                                                                                                                                                                                                                                                                                                                                                                                                                                                                                                                                                                                                                                                                                                                                                                                                                                                     | <i>bla</i> <sub>CTX-M-9</sub> : 21/22<br><i>qnrA</i> : 22/21                                                            | ☉/? |
| 54 | <i>bla</i> <sub>CTX-M-14</sub> control (neat) | Unknown              | <i>bla</i> <sub>CTX-M-14</sub>                                                                                                                                                                                                                                                                                                                                                                                                                                                                                                                                                                                                                                                                                                                                                                                                                                                                                                                                                                                                                    | <i>bla</i> <sub>CTX-M-9</sub> : 20/22                                                                                   | ☉   |
| 55 | 3* Anonymised *                               | <i>E. faecium</i>    | VRE: ampicillin and vancomycin resistant                                                                                                                                                                                                                                                                                                                                                                                                                                                                                                                                                                                                                                                                                                                                                                                                                                                                                                                                                                                                          | <i>vanA</i> : 21<br><i>ermB</i> : 21/21                                                                                 | ☉/? |
| 56 | * Anonymised *                                | <i>E. faecium</i>    | VRE: ampicillin and vancomycin resistant                                                                                                                                                                                                                                                                                                                                                                                                                                                                                                                                                                                                                                                                                                                                                                                                                                                                                                                                                                                                          | <i>vanA</i> : 22<br><i>ermB</i> : 20/22                                                                                 | ☉/? |
| 57 | NCTC 13437                                    | <i>P. aeruginosa</i> | <i>bla</i> <sub>VIM-2</sub><br><i>bla</i> <sub>VEB-1</sub><br><i>fosA</i> <sup>\$</sup><br><i>aadA1</i> <sup>\$</sup><br><i>aph</i> (3')-Iib <sup>\$</sup><br><i>aac</i> (6')-II <sup>\$</sup><br><i>ant</i> (2'')-Ia <sup>\$</sup><br><i>aac</i> (6')-II <sup>\$</sup><br><i>crpP</i> , <i>sul1</i> <sup>\$</sup><br><i>dfrB2</i> <sup>\$</sup><br><i>tet</i> (A) <sup>\$</sup><br><i>bla</i> <sub>PAO</sub> <sup>\$</sup><br><i>bla</i> <sub>OXA-50</sub> <sup>\$</sup><br><i>bla</i> <sub>OXA-10</sub> <sup>\$</sup><br><i>qacE</i> <sup>\$</sup><br><i>catB7</i> <sup>\$</sup>                                                                                                                                                                                                                                                                                                                                                                                                                                                                | <i>bla</i> <sub>VIM</sub> : 15/19/25<br><i>bla</i> <sub>VEB</sub> : 17/16                                               | ☉   |
| 58 | NCTC 13443                                    | <i>K. pneumoniae</i> | <i>bla</i> <sub>NDM-1</sub><br><i>bla</i> <sub>OXA-1</sub><br><i>bla</i> <sub>CTX-M-15</sub><br><i>msr</i> (E) <sup>\$</sup><br><i>fosA</i> <sup>\$</sup><br><i>aac</i> (3)-Iid <sup>\$</sup><br><i>aph</i> (6)-Id <sup>\$</sup><br><i>aac</i> (6')-Ib <sup>\$</sup><br><i>aadA1</i> <sup>\$</sup><br><i>aac</i> (6')-Ib-cr <sup>\$</sup><br><i>aac</i> (3)-IIa <sup>\$</sup><br><i>armA</i> <sup>\$</sup><br><i>aph</i> (3'')-Ib <sup>\$</sup><br><i>ere</i> (A) <sup>\$</sup><br><i>msr</i> (E) <sup>\$</sup><br><i>mph</i> (E) <sup>\$</sup><br><i>OqxA</i> <sup>\$</sup><br><i>OqxB</i> <sup>\$</sup><br><i>dfrA1</i> <sup>\$</sup><br><i>sul2</i> <sup>\$</sup><br><i>sul1</i> <sup>\$</sup><br><i>ARR-2</i> <sup>\$</sup><br><i>aadA1</i> <sup>\$</sup><br><i>bla</i> <sub>SHV-70</sub> <sup>\$</sup><br><i>bla</i> <sub>SHV-13</sub> <sup>\$</sup><br><i>bla</i> <sub>SHV-11</sub> <sup>\$</sup><br><i>bla</i> <sub>SHV-28</sub> <sup>\$</sup><br><i>bla</i> <sub>SHV-25</sub> <sup>\$</sup><br><i>bla</i> <sub>TEM-1A</sub> <sup>\$</sup> | <i>bla</i> <sub>NDM</sub> : 23/22/25<br><i>bla</i> <sub>OXA-1</sub> : 20/20<br><i>bla</i> <sub>CTX-M-1</sub> : 17/17/16 | ☉   |

|    |            |                      |                                                                                                                                                                                                                                                                                                                                                                                                                                                                                                                                                                                             |                                                                       |   |
|----|------------|----------------------|---------------------------------------------------------------------------------------------------------------------------------------------------------------------------------------------------------------------------------------------------------------------------------------------------------------------------------------------------------------------------------------------------------------------------------------------------------------------------------------------------------------------------------------------------------------------------------------------|-----------------------------------------------------------------------|---|
|    |            |                      | <i>bla</i> <sub>DHA-7</sub> <sup>\$</sup><br><i>bla</i> <sub>SHV-31</sub> <sup>\$</sup><br><i>bla</i> <sub>DHA-24</sub> <sup>\$</sup><br><i>bla</i> <sub>SHV-69</sub> <sup>\$</sup><br><i>bla</i> <sub>SHV-185</sub> <sup>\$</sup><br><i>bla</i> <sub>CMY-4</sub> <sup>\$</sup><br><i>bla</i> <sub>DHA-1</sub> <sup>\$</sup><br><i>bla</i> <sub>SHV-106</sub> <sup>\$</sup><br><i>bla</i> <sub>TEM-1</sub> <sup>\$</sup><br><i>qacE</i> <sup>\$</sup><br><i>qacE</i> <sup>\$</sup><br><i>catB3</i> <sup>\$</sup><br><i>catA1</i> <sup>\$</sup><br><i>cmlA1</i> <sup>\$</sup>                |                                                                       |   |
| 59 | NCTC 13438 | <i>K. pneumoniae</i> | <i>bla</i> <sub>KPC-3</sub><br><i>bla</i> <sub>OXA-9</sub> <sup>\$</sup><br><i>aph(3')-Ia</i> <sup>\$</sup><br><i>aac(6')-Ib</i> <sup>\$</sup><br><i>aadA2b</i> <sup>\$</sup><br><i>aadA2</i> <sup>\$</sup><br><i>fosA</i> <sup>\$</sup><br><i>mph(A)</i> <sup>\$</sup><br><i>OqxA</i> <sup>\$</sup><br><i>OqxB</i> <sup>\$</sup><br><i>aac(6')-Ib-cr</i> <sup>\$</sup><br><i>sul1</i> <sup>\$</sup><br><i>dfrA12</i> <sup>\$</sup><br><i>bla</i> <sub>SHV-182</sub> <sup>\$</sup><br><i>bla</i> <sub>TEM-1A</sub> <sup>\$</sup><br><i>qacE</i> <sup>\$</sup><br><i>catA1</i> <sup>\$</sup> | <i>bla</i> <sub>KPC</sub> : 19/19/16                                  | ⊙ |
| 60 | NCTC 13476 | <i>E. coli</i>       | <i>bla</i> <sub>IMP</sub><br><i>aac(3)-IIId</i> <sup>\$</sup>                                                                                                                                                                                                                                                                                                                                                                                                                                                                                                                               | <i>bla</i> <sub>IMP</sub> : 21/21<br><i>bla</i> <sub>IMP-1</sub> : 20 | ⊙ |

⊙ = correlation; ? = unknown correlation; \$ = genes not present on AMR-TAC; MRSA: methicillin resistant *Staphylococcus aureus*; MSSA: methicillin susceptible *Staphylococcus aureus*; VRE: vancomycin resistant *Enterococcus*⊙

Table S5: Concordance of antimicrobial resistance gene TaqMan array card results in faecal and respiratory samples obtained from children with suspected lower respiratory tract infection.

|        |   | <i>blaCTX-M-1</i> |    |    |
|--------|---|-------------------|----|----|
| Faecal |   | Respiratory       |    |    |
|        |   | +                 | -  |    |
|        | + | 0                 | 1  | 1  |
|        | - | 0                 | 66 | 66 |
|        |   | 0                 | 67 |    |

|        |   | <i>blaCTX-M-9</i> |    |    |
|--------|---|-------------------|----|----|
| Faecal |   | Respiratory       |    |    |
|        |   | +                 | -  |    |
|        | + | 0                 | 1  | 1  |
|        | - | 0                 | 66 | 66 |
|        |   | 0                 | 67 |    |

|        |   | <i>ermB</i> |    |    |
|--------|---|-------------|----|----|
| Faecal |   | Respiratory |    |    |
|        |   | +           | -  |    |
|        | + | 5           | 30 | 35 |
|        | - | 5           | 27 | 32 |
|        |   | 10          | 57 |    |

  

|        |   | <i>mecA</i> |    |    |
|--------|---|-------------|----|----|
| Faecal |   | Respiratory |    |    |
|        |   | +           | -  |    |
|        | + | 3           | 6  | 9  |
|        | - | 5           | 53 | 58 |
|        |   | 8           | 59 |    |

|        |   | <i>mecC</i> |    |    |
|--------|---|-------------|----|----|
| Faecal |   | Respiratory |    |    |
|        |   | +           | -  |    |
|        | + | 0           | 2  | 2  |
|        | - | 0           | 65 | 65 |
|        |   | 0           | 67 |    |

|        |   | <i>vanB</i> |    |    |
|--------|---|-------------|----|----|
| Faecal |   | Respiratory |    |    |
|        |   | +           | -  |    |
|        | + | 0           | 1  | 1  |
|        | - | 0           | 66 | 66 |
|        |   | 0           | 67 |    |

|        |   | <i>TOTAL</i> |     |     |
|--------|---|--------------|-----|-----|
| Faecal |   | Respiratory  |     |     |
|        |   | +            | -   |     |
|        | + | 8            | 41  | 49  |
|        | - | 10           | 353 | 363 |
|        |   | 18           | 394 |     |
